# Supplementary material for: Polycrystalline SnSx nanofilm enables CO2 electroreduction to formate with high current density
Source: Royal Society of Chemistry journal article supplement (doi:10.1039/d2cc01888h), 2022-01-01
Supplement: d2cc01888h1.pdf [file d2cc01888h1.pdf]

## ***Electronic Supplementary Information for***

### **Polycrystalline SnS<sub>x</sub> nanofilm enables CO<sub>2</sub> electroreduction to formate with high current density**

Xinzhong Wang<sup>a,†</sup>, Shuai Liu<sup>b,†</sup>, Hao Zhang<sup>b,†</sup>, Shusheng Zhang<sup>c</sup>, Ge Meng<sup>d\*</sup>, Qian Liu<sup>e</sup>, Zhiyong Sun<sup>f\*</sup>, Jun Luo<sup>b</sup>, and Xijun Liu<sup>g\*</sup>

<sup>a</sup> Information Technology Research Institute, Shenzhen Institute of Information Technology, Shenzhen 518172, China

<sup>b</sup> Institute for New Energy Materials and Low-Carbon Technologies, School of Materials Science and Engineering, Tianjin University of Technology, Tianjin 300384, China.

<sup>c</sup> College of Chemistry, Zhengzhou University, Zhengzhou 450000, China.

<sup>d</sup> Key Laboratory of Carbon Materials of Zhejiang Province, College of Chemistry and Materials Engineering, Wenzhou University, Wenzhou 325035, China.

<sup>e</sup> Institute for Advanced Study, Cheng Du University, Chengdu 610106, Sichuan, China.

<sup>h</sup> State Key Laboratory for Marine Corrosion and Protection, Luoyang Ship Material Research Institute (LSMRI), Qingdao 266273, China.

<sup>g</sup> MOE Key Laboratory of New Processing Technology for Non-Ferrous Metals and Materials, and Guangxi Key Laboratory of Processing for Non-Ferrous Metals and Featured Materials, School of Resource, Environments and Materials, Guangxi University, Nanning 530004, China.

<sup>†</sup> These authors contributed equally to this work.

\*E-mail: xjliu@tjut.edu.cn; mengge@wzu.edu.cn; szy\_sunrui725@163.com.

## **Experimental Section**

### ***Synthesis of $p$ -SnS<sub>x</sub>***

The vacuum evaporation method was applied to deposit  $p$ -SnS<sub>x</sub> nanofilm on a piece of gas-diffusion layer (GDL)-modified carbon paper (10 × 10 cm) using a DM-450 vacuum evaporation machine. The SnS<sub>2</sub> slugs (purchased from Alfa Aesar) on a tungsten boat were used as precursors. Before evaporation, the chamber pressure was decreased below  $4 \times 10^{-3}$  Pa using a turbopump. The heating current imposed on the tungsten boat was kept at  $\sim 1.5$  A, and the evaporation rate was kept at  $10 \text{ \AA s}^{-1}$  during the experiment. The ratio of SnS : SnS<sub>2</sub> can be achieved by adjusting heating current. The thickness of the evaporated film was monitored by a quartz crystal oscillator. The thickness of SnS<sub>x</sub> films were kept constant as about 800 nm. The as-obtained carbon paper was directly used as a cathode for CO<sub>2</sub> electrolysis.

### ***Characterizations***

The morphologies and microstructures of samples were characterized by scanning electron microscopy (SEM, FEI Verios 460) and transmission electron microscopy (TEM, Talos F200X) equipped with an energy dispersive spectrometer (EDS). Powder X-ray diffraction (XRD) pattern was recorded by an X-ray diffractometer (Rigaku SmartLab 9 kW) at a scan rate of  $10 \text{ min}^{-1}$  with Cu K $\alpha$  radiation ( $\lambda = 0.154598 \text{ nm}$ ). X-ray photoelectron spectroscopy (XPS) measurement was collected on a Thermo Scientific K-alpha XPS system with the Al K $\alpha$  radiation as the X-ray source, and the C 1s peak was referred to the binding energy of 284.8 eV.

### ***ECR performance***

ECR tests were first conducted with an electrochemical station (CHI 760E) in an H-type cell with 0.1 M KHCO<sub>3</sub> solution. The two compartments were separated by a Nafion membrane. Ag/AgCl and graphite rod were used as the reference and counter electrodes, respectively. Carbon paper coated with the *p*-SnS<sub>x</sub> nanofilm (2 cm<sup>2</sup>) was used as the working electrode. Prior to the ECR, the cathodic electrolyte was saturated with CO<sub>2</sub>/Ar for 30 min, and the rate of CO<sub>2</sub> flow was 20 mL min<sup>-1</sup>. The linear sweep voltammetry (LSV) curves were recorded at a sweep rate of 10 mV s<sup>-1</sup>. *i*R compensation was applied to all initial data. All of the potential values were calculated based on the equation:  $E_{\text{RHE}} = E_{\text{Ag/AgCl}} + 0.0591 \times \text{pH} + 0.197$ . The gaseous products were detected by gas chromatography (Agilent GC-7890). The liquid products were analyzed by <sup>1</sup>H NMR on AVANCE AV III 400 with water peak suppression.

In view of the proportional relationship between ECSA and  $C_{\text{dl}}$ , the CV test at different scan rates (5, 10, 15, 20, and 25 mV s<sup>-1</sup>) is performed in a narrow non-Faraday interval (-0.4~-0.35 V vs RHE). The  $\Delta j$  (current difference between anode  $j_a$  and cathode current density  $j_c$ ) corresponding to the intermediate potential is plotted against different scan rates, and the slope of the straight line can reflect the ECSA.

Electrochemical impedance spectroscopy (EIS) was captured using an Autolab PGSTAT302N potentiostat / galvanostat in the frequency range from 10<sup>5</sup> to 10<sup>-2</sup> Hz with an AC amplitude of 5 mV.

### ***MEA tests***

Accordng to our previous work [17,20], an aqueous MEA cell was assembled using

$p$ -SnS<sub>x</sub> as the cathode, and a Ti felt coated with commercial IrO<sub>2</sub> catalyst was applied as the anode. The humidified CO<sub>2</sub> gas was kept at 50 standard cubic centimeter per minute (sccm) during the testing and the anodic electrolyte (0.1 M KHCO<sub>3</sub>) was circulated. The anode and cathode were physically separated by an anion exchange membrane (AEM).

### ***DFT calculations***

DFT calculations use the DMol<sup>3</sup> code for energy calculations of the reaction mechanism. Generalized gradient approximation (GGA) processing is performed using the Perdew-Burke-Ernzerhof (PBE) functional. The {100} facet was used with a 4 x 4 x 4 atom slab and 20 Å between mirror images in the z-axis in the unit cell. Structural and unit cell optimizations were performed with the BFGS algorithm until the maximum cutoff was less than 0.02 eV/atom with the structures being fully optimized. Based on the computational hydrogen electrode model proposed by Nørskov's group, the free energy of species in the electrochemical reaction pathway was calculated.

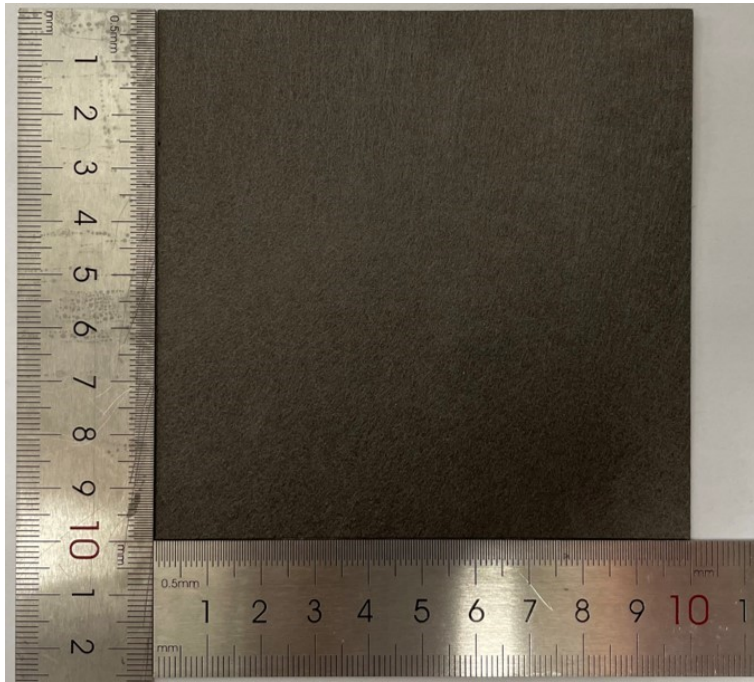

**Fig. S1.** The optical image of  $p\text{-SnS}_x$  nanofilm coated carbon paper. The

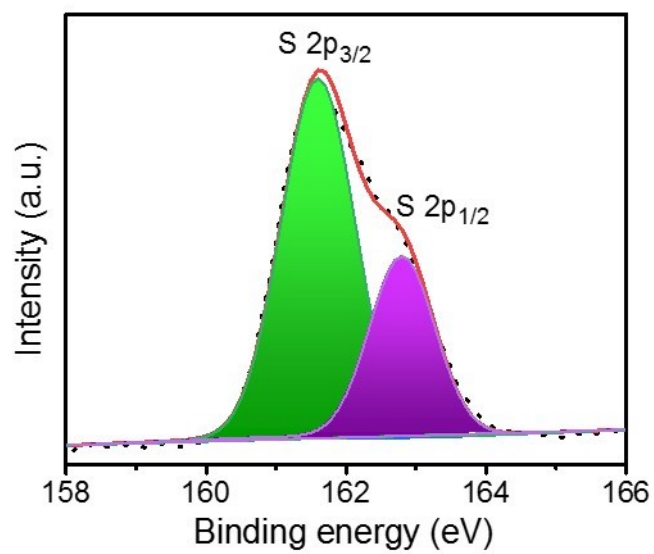

**Fig. S2.** High-resolution S 2p XPS spectrum of  $p\text{-SnS}_x$ .

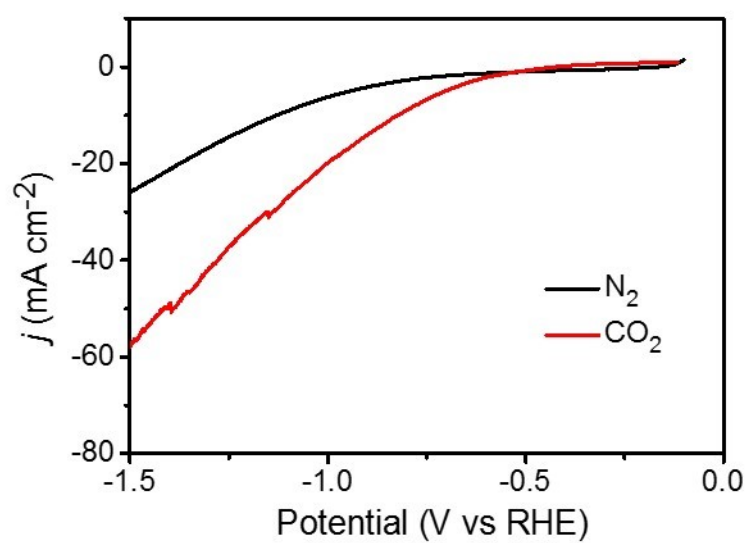

**Fig. S3.** ECR LSV curves of  $p\text{-SnS}_x$  in  $\text{Ar}/\text{CO}_2$ -saturated 0.1 M  $\text{KHCO}_3$  electrolyte.

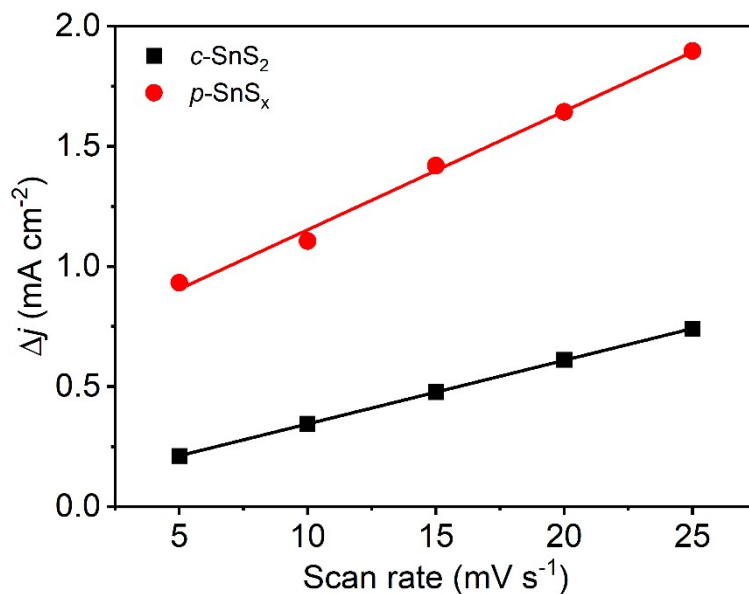

**Fig. S4.** The double-layer capacitance ( $C_{dl}$ ) measurements of *p*-SnS<sub>x</sub> and *c*-SnS<sub>2</sub> in CO<sub>2</sub>-saturated 0.1 M KHCO<sub>3</sub> electrolyte. It can be found that *p*-SnS<sub>x</sub> delivers a higher  $C_{dl}$  (7.8 mF cm<sup>-2</sup>) than that of *c*-SnS<sub>2</sub> (6.5 mF cm<sup>-2</sup>), suggesting its remarkably larger number of active sites.



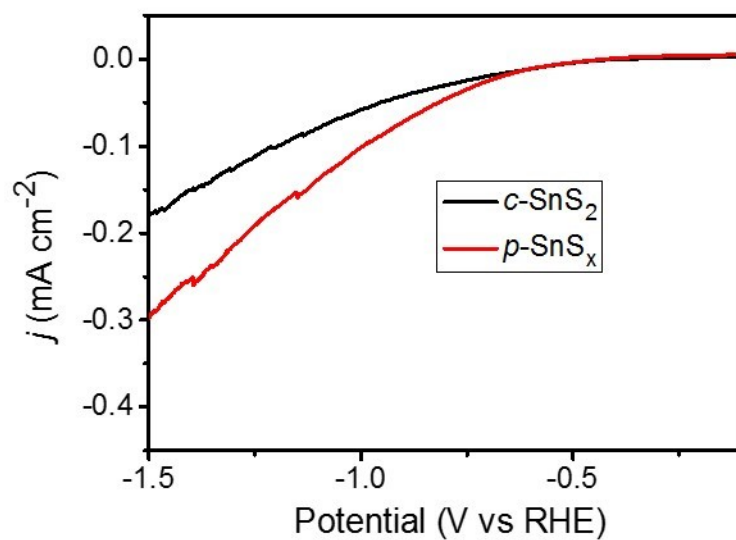

**Fig. S5.** ECSA-corrected LSV curves of *p*-SnS<sub>x</sub> and *c*-SnS<sub>2</sub>. Clearly, *p*-SnS<sub>x</sub> shows a higher corrected current density than that of *c*-SnS<sub>2</sub>.

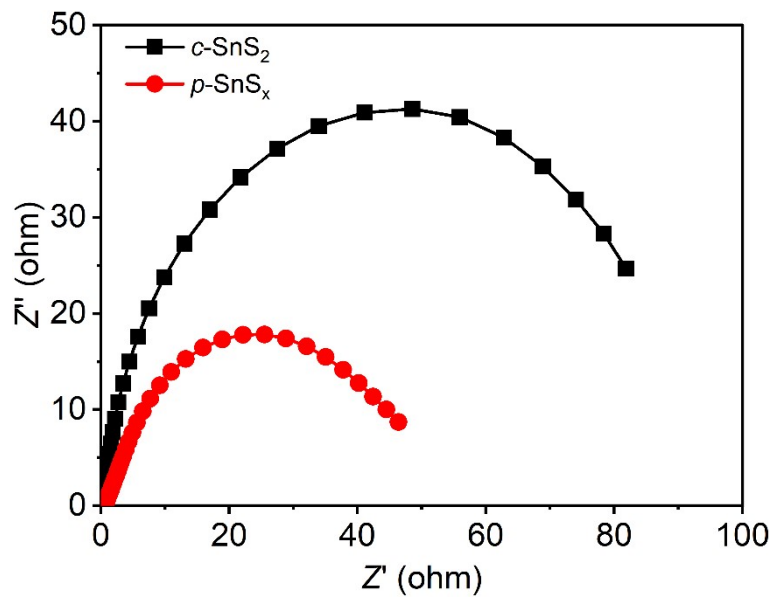

**Fig. S6.** EIS measurements of  $p\text{-SnS}_x$  and  $c\text{-SnS}_2$  in  $\text{CO}_2$ -saturated 0.1 M  $\text{KHCO}_3$  electrolyte. Clearly,  $p\text{-SnS}_x$  shows a smaller charge transfer resistance as compared to  $c\text{-SnS}_2$  due to its nanosheets array morphology. This endows fast mass transport and electron transfer rates required for the  $\text{CO}_2$  electrolysis.

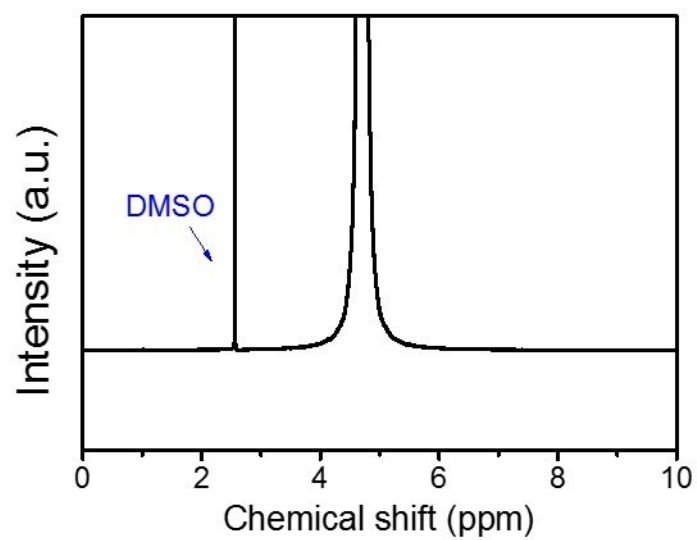

**Fig. S7.**  $^1\text{H}$  NMR spectrum of  $p\text{-SnS}_x$  recorded at Ar electrolysis.

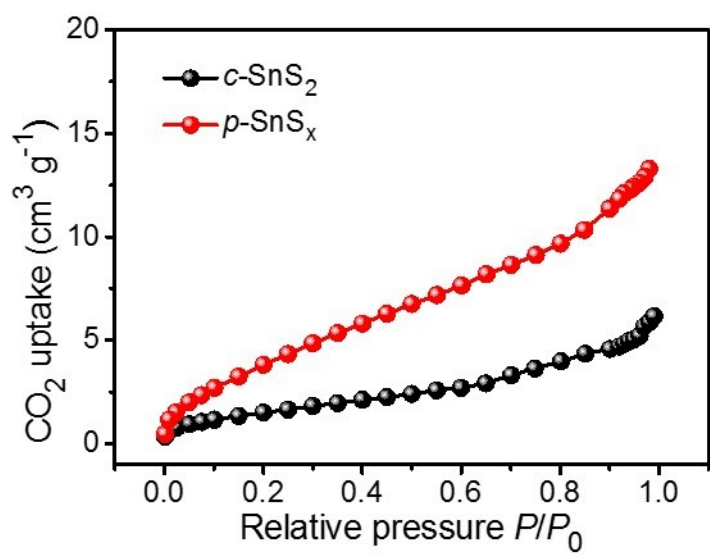

**Fig. S8.**  $\text{CO}_2$  adsorption isotherms of  $p\text{-SnS}_x$  and  $c\text{-SnS}_2$ .

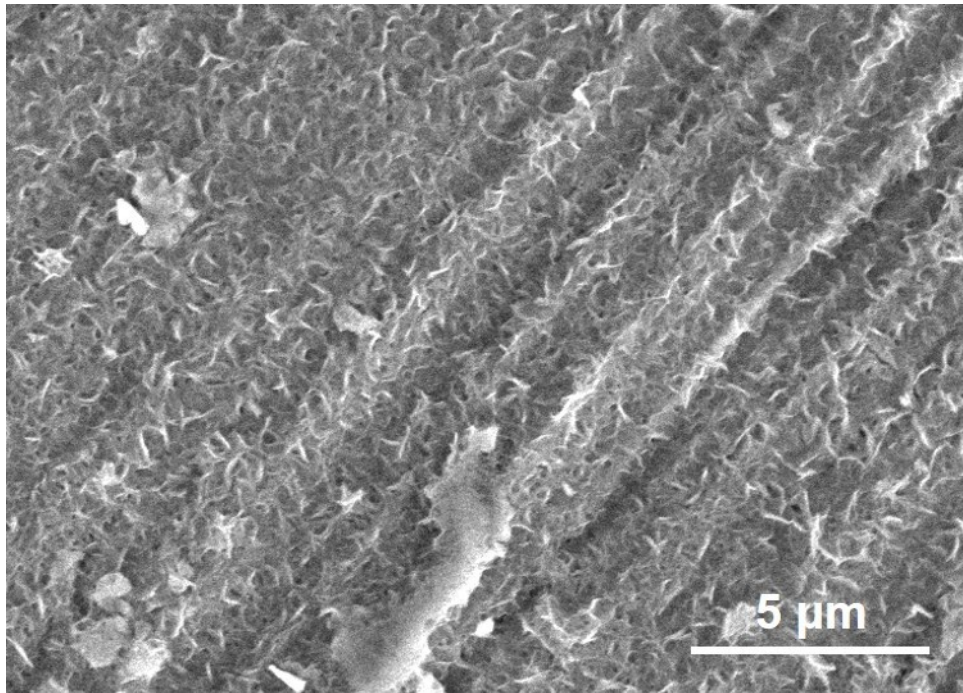

**Fig. S9.** SEM image of  $p\text{-SnS}_x$  after the  $\text{CO}_2$  electrolysis. By contrast, the morphology of  $p\text{-SnS}_x$  still preserved after the long-term electrolysis.

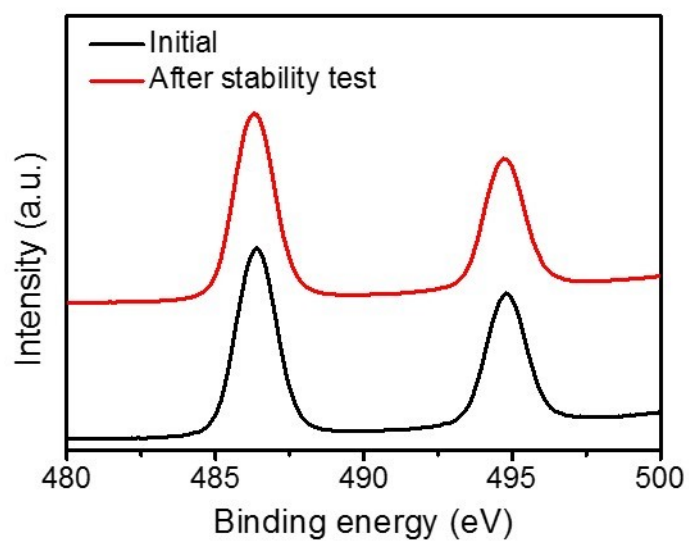

**Fig. S10.** High-resolution Sn 3d XPS spectrum of  $p\text{-SnS}_x$  after the  $\text{CO}_2$  electrolysis.

As seen, there is no notable change before and after the long-term electrolysis, suggesting the good chemical stability of  $p\text{-SnS}_x$ .

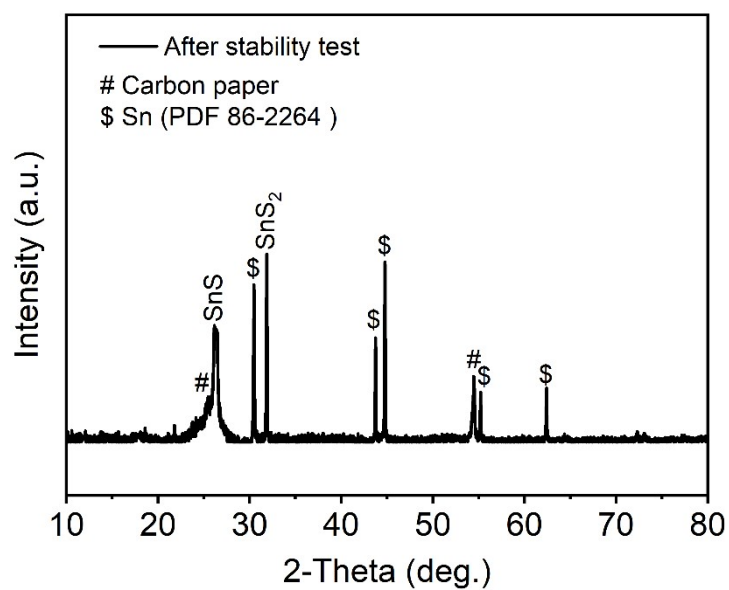

**Fig. S11.** XRD pattern of  $p\text{-SnS}_x$  after the  $\text{CO}_2$  electrolysis. As seen, diffraction peaks correspond to SnS and  $\text{SnS}_2$  were still preserved, suggesting  $p\text{-SnS}_x$  is partially reduced at negative working potentials.

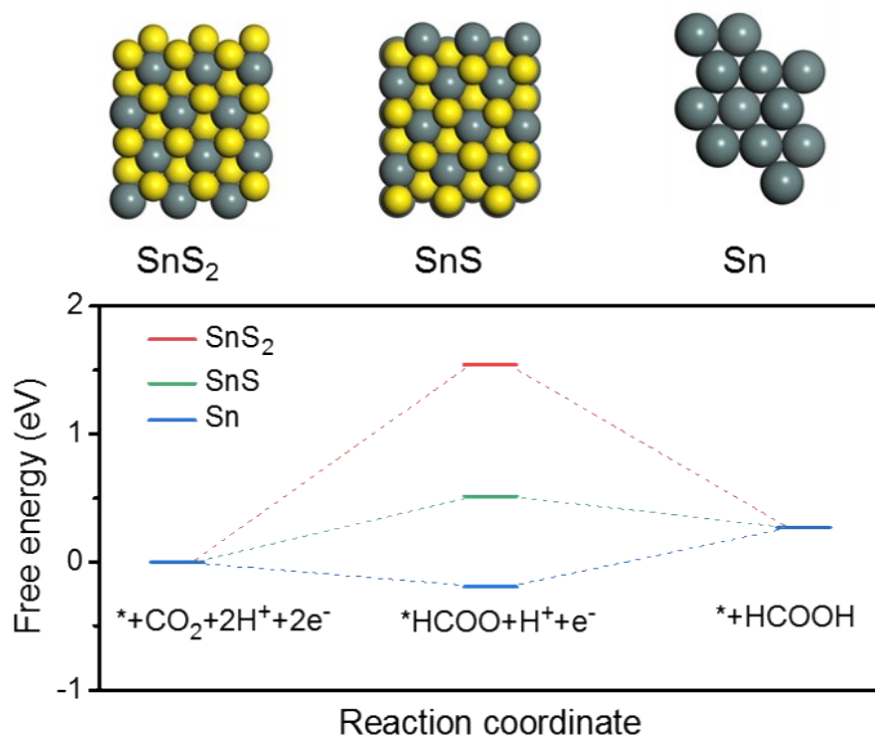

**Fig. S12.** (a) Geometries of pure Sn, SnS and SnS<sub>2</sub>. (b) Free energy diagrams for pure Sn, SnS and SnS<sub>2</sub>. It can be found that the formate pathway on pure Sn is more favorable as compared to SnS and SnS<sub>2</sub>.



**Table S1.** Sn-based catalysts of CO<sub>2</sub> electroreduction results tested in H-type cell.

| Electrode                          | Potential         | Formate (FE/%) | Stability (h)             | Tafel slope (mV dec <sup>-1</sup> ) | Current density (mA cm <sup>-2</sup> ) | Reference                            |
|------------------------------------|-------------------|----------------|---------------------------|-------------------------------------|----------------------------------------|--------------------------------------|
| SnO <sub>2</sub> /graphene         | -1.8 vs SCE       | 93%            | –                         | ~70                                 | ~10 (-1.8 vs SCE)                      | J. Am. Chem. Soc. 2014, 136, 1734    |
| Sn foil                            | -1.7 vs SCE       | 95%            | 10 (dropped to ~40%)      | –                                   | 27.9 (-2.0 vs SCE)                     | J. Electrochem. Soc. 2012, 159, F353 |
| Graphene confined Sn               | -1.8 vs SCE       | 89%            | 50 (no significant drop)  | 83                                  | 21.1 (-1.8 vs SCE)                     | Nat. Commun. 2016, 7, 12697          |
| PEI-NCNT/GC                        | -1.8 vs SCE       | 87%            | ~25 (no significant drop) | 134                                 | 7.2 (-1.8 vs SCE)                      | J. Am. Chem. Soc. 2014, 136, 7845    |
| SnS <sub>2</sub> derived Sn        | -1.4 vs Ag/AgCl   | 84.5%          | ~15 (no significant drop) | 83                                  | 13.9 (-1.4 vs Ag/AgCl)                 | Nano Energy 2017, 31, 270            |
| Sn-pNW                             | -0.8 V vs RHE     | 80%            | 15 (no significant drop)  | 134                                 | ~10 (-1.0 V vs RHE)                    | Angew. Chem. 2017, 129, 3699         |
| Sn-SnO <sub>2</sub>                | -1.2 vs Ag/AgCl   | 64%            | 2 (no significant drop)   | 115                                 | ~4 (-1.2 vs Ag/AgCl)                   | J. Mater. Chem. A 2014, 2, 1647      |
| SnO <sub>2</sub> and Sn nanopowder | -0.6 V vs RHE     | 67%            | 5 (dropped to ~50%)       | –                                   | ~15 (-0.6 V vs RHE)                    | J. Phys. Chem. C 2015, 119, 4884     |
| Commercial Sn                      | -1.8 V vs Ag/AgCl | 91%            | 40 (dropped to ~40%)      | –                                   | ~3 (-1.8 V vs Ag/AgCl)                 | J. Power Sources 2014, 253, 276      |
| Electrodeposited Sn                | -1.4 V vs SCE     | 91%            | 6 (dropped to ~35%)       | –                                   | 15 (-1.4 V vs SCE)                     | Chem. Eng. J. 2016, 293, 161         |
| SnS <sub>2</sub> monolayers        | -0.8 V vs RHE     | 94 ± 5%        | 80 (no significant)       | 68                                  | 45 (-0.8 V vs                          | J. Catal. 2018, 364, 125             |

|                  |               |              | drop)                    |    | RHE)               |                  |
|------------------|---------------|--------------|--------------------------|----|--------------------|------------------|
| $p\text{-SnS}_x$ | -1.0 V vs RHE | $97 \pm 2\%$ | 50 (no significant drop) | 79 | 15 (-1.0 V vs RHE) | <i>This work</i> |

**Table S2.** Performance comparison of this work and literature in an AEM-based MEA electrolyzer.

| Electrode                  | FE <sub>formate</sub> | Stability (h) | $j_{\text{formate}}$ (mA cm <sup>-2</sup> ) | Reference                                  |
|----------------------------|-----------------------|---------------|---------------------------------------------|--------------------------------------------|
| sulfur-doped Sn            | >85%                  | –             | 25~100                                      | Nat. Commun. 2019, 10, 892                 |
| Bi <sub>0.1</sub> Sn       | 97.8%<br>(–3.6 V)     | –             | 120<br>(–3.6 V)                             | Nat. Commun. 2021, 12, 5223                |
| CuBi                       | 98.35<br>(–1.07 V)    | –             | 56.6<br>(–1.8 vs SCE)                       | J. Colloid Interface Sci. 2022, 606, 994   |
| nBuLi-Bi                   | ~95%<br>(–1.44 V)     | 100           | 440<br>(–2.19 vs SCE)                       | Nat. Commun. 2020, 11, 3633                |
| NRS-SnO                    | 87%<br>(–0.8 V)       | –             | 383<br>(–0.8 V)                             | J. CO <sub>2</sub> Util., 2020, 42, 101287 |
| <i>p</i> -SnS <sub>x</sub> | 93 ± 3%<br>(–2.6 V)   | 30            | 420<br>(–2.6 V)                             | <i>This work</i>                           |
